# Both cell-intrinsic and environmental factors constrain speed and persistence in T cell migration

Inge M N Wortel<sup>1,\*</sup>, Ioana Niculescu<sup>2</sup>, Martijn Koliijn<sup>2</sup>, Nir Gov<sup>3</sup>,  
Rob J de Boer<sup>2</sup>, and Johannes Textor<sup>1,2</sup>

June 4, 2018

<sup>1</sup>Department of Tumor Immunology, Radboud Institute for Molecular Life Sciences, Nijmegen, the Netherlands

<sup>2</sup>Theoretical Biology and Bioinformatics, Department of Biology, Utrecht University, Utrecht, the Netherlands

<sup>3</sup>Department of Chemical and Biological Physics, Weizmann Institute of Science, Rehovot, Israel

## Abstract

T cells are key effector cells in the immune system that are well-known for their ability to adapt their shape and behavior to environmental cues. It has been suggested that these highly diverse, context-dependent migration patterns reflect an optimization process – where T cells adjust motility parameters such as speed and persistence to aid their search for antigen. Whereas models investigating such “search strategies” typically treat speed and persistence as independent variables, one aspect of cell motility was recently found to be conserved across a large variety of cell types: fast-moving cells turn less frequently. This raises the question whether T cells can tune speed and persistence independently of each other. We therefore investigated to what extent this universal coupling between cell speed and persistence (UCSP) shapes the behavior of migrating T cells. We first show that the UCSP emerges spontaneously in an *in silico* Cellular Potts Model (CPM) of T cell migration. Our model shows a link between the UCSP and cell shape dynamics, which put an upper bound on both the speed and the persistence a cell can reach. We then use the CPM to examine how environmental constraints affect motility patterns of T cells migrating in the crowded environments they also face *in vivo*, and show that T cells completely lose their speed-persistence coupling when confined in a densely packed environment such as the epidermis. Thus, although our model further highlights the validity of the UCSP in migrating cells, it also demonstrates that environmental factors may overrule this coupling. Our data show that T cell motility parameters are subject to both cell-intrinsic and extrinsic constraints, suggesting that “optimal” T cell search strategies may not always be attainable *in vivo*.

**Keywords:** T cell migration, Directed migration, Universal Coupling Speed and Persistence (UCSP), Cellular Potts Model, T cell search strategies

## 28 1 Introduction

29 T cells have the rare ability to migrate in nearly all tissues within the human body. Especially in tissues with a  
30 high risk of infection – like the lung, the gut, and the skin – T cells are continuously on the move in search of  
31 foreign invaders. Furthermore, migration in lymphoid organs such as the thymus and lymph nodes is crucial  
32 for T cell function.

33 Although T cells preserve their motility in these different contexts, they do adapt their morphology and  
34 migratory behavior to environmental cues. It has been suggested that this remarkably flexible behavior reflects  
35 different “search strategies” that allow T cells to maximize the chance of encountering antigen (Krummel et al.,  
36 2016). For example, naive T cells rapidly crawl along a network of stromal cells in the lymph node, alternating  
37 between short intervals of persistent movement and random changes in direction (Miller et al., 2002, 2003;  
38 Bajnoff et al., 2006; Beauchemin et al., 2007). This “stop and go” behavior allows them to cover large areas of the  
39 lymph node in a short amount of time, and appears to be a good strategy for finding rare antigens without prior  
40 information on their location (Krummel et al., 2016; Bnichou et al., 2011; Tejedor et al., 2012; Chupeau et al.,  
41 2015). Developing T cells adopt a similar strategy to find their specific ligand during negative selection in the  
42 thymic medulla (Borgne et al., 2009; Klein, 2009). By contrast, positive selection in the thymic cortex involves  
43 migration at much lower speeds – which is thought to reflect the more broad distribution of positively selecting  
44 ligands in the thymus (Germain et al., 2012). Thus, different migration strategies may be optimal in different  
45 environments and contexts.

46 Studies investigating these T cell search strategies typically rely on variations of random walk models  
47 (Krummel et al., 2016). Such models assume that T cells can tune motility parameters (such as speed and turning  
48 behavior) independently of each other to obtain an “optimal” movement pattern. However, recent data suggest  
49 that this may not be the case, because a Universal Coupling between Speed and Persistence (UCSP) appears to  
50 exist in all migrating cells (Maiuri et al., 2012; Wu et al., 2014; Maiuri et al., 2015). Among cell tracks recorded  
51 under standardized conditions, Maiuri et al saw that all cells analyzed followed one general rule: faster cells  
52 moved more persistently. They proposed that this coupling arises from a positive feedback on cell polarity  
53 regulated by movement of the actin cytoskeleton. Because specialized clutch molecules keep actin filaments  
54 fixed with respect to the cell’s surroundings, these filaments move backwards in the reference frame of the  
55 moving cell. This “actin retrograde flow” is linearly dependent on cell speed. Using a mathematical model,  
56 Maiuri et al were able to show that actin retrograde flow can also stabilize cell polarity (and thus persistence)  
57 if it transports polarity cues towards the cell’s rear end. Thus, higher speeds are linked to higher persistence  
58 because they stabilize cell polarity via the actin retrograde flow (Maiuri et al., 2015). As actin retrograde flow is  
59 a highly conserved feature of cell migration, the UCSP is a general migration law that holds for celltypes with  
60 very different migration modes.

61 Maiuri et al derived the UCSP from experiments where cells moved freely in a relatively open space, without  
62 any of the barriers normally posed by surrounding tissue. However, T cells rarely move in open space, and *in*  
63 *vivo* imaging as well as *in silico* modelling studies have highlighted the importance of external cues for T cell  
64 migratory behavior (Bajnoff et al., 2006; Beltman et al., 2007). A key open question is therefore whether the  
65 UCSP remains the major determinant of speed and persistence for T cells migrating in such complex, crowded  
66 environments – making the UCSP a truly universal law of T cell migration *in vivo*.

67 Here, we examine to what extent the UCSP can impact T cell migration patterns, using an existing Cellular  
68 Potts Model (CPM) of T cell migration that reproduces realistic cell shapes and migratory behavior *in silico*  
69 (Niculescu et al., 2015). We first show that this model not only reproduces the UCSP, but also explains how cell  
70 shape dynamics put a natural upper bound on both the speed and persistence of migrating cells. We then apply  
71 the CPM to the extreme case of T cell migration in a densely packed epidermis, and show that environmental  
72 constraints overrule the UCSP in this setting. Thus, our data confirm the universality of the UCSP across a  
73 range of different cell shapes and migration modes, but also predict that this cell-intrinsic coupling may be  
74 obscured in at least some of the environments T cells face *in vivo* – where cell-extrinsic factors place more  
75 stringent constraints on motility parameters.

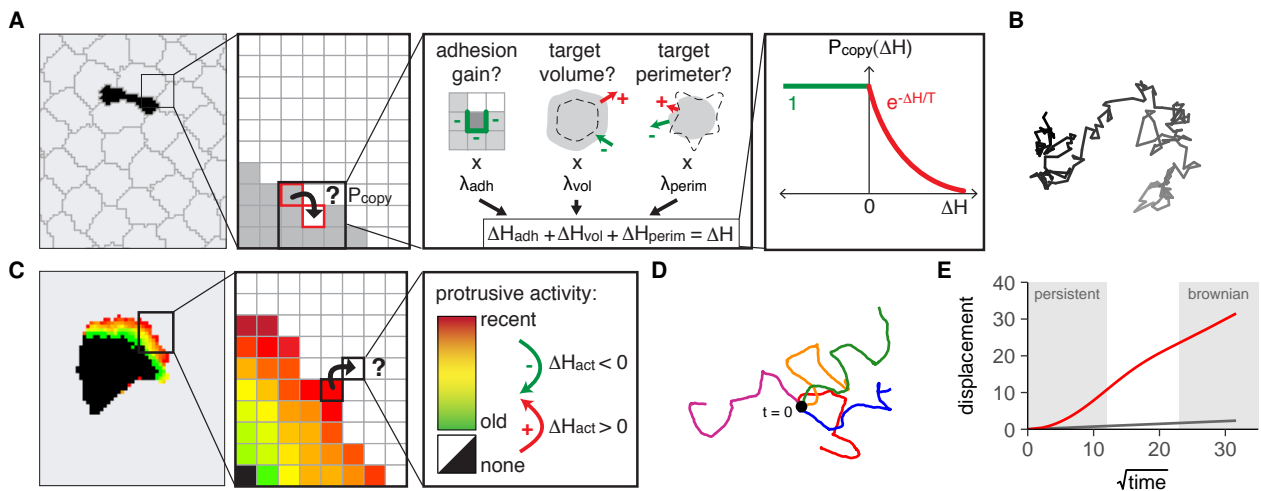

**Figure 1:** *In silico* simulation of shape-driven T cell migration within complex environments. **(A)** A CPM models a tissue as a collection of pixels on a grid that each belong to a specific cell (or to surroundings). Pixels randomly try to copy their cell identity into pixels belonging to neighbor cells, with a success probability  $P_{\text{copy}}$  that depends on the effect the change would have on physical properties of the involved cells (cell-cell adhesion, and deviation from target volume/perimeter, dashed lines). The weighted sum of these energetic effects ( $\Delta H$ ) is negative when a copy attempt is energetically favourable. **(B)** In a CPM with only adhesion, volume, and perimeter constraints, cells only exhibit Brownian motion. Plot shows an example cell track. **(C)** In the Act model (Niculescu et al., 2015), each pixel has an “activity” that represents the time since its most recent protrusive activity. Copy attempts from active to less active pixels are stimulated (negative  $\Delta H_{\text{act}}$ ), whereas copy attempts from inactive to more active pixels are punished (positive  $\Delta H_{\text{act}}$ ). **(D)** Act cells alternate between persistent motion and “stops” in which they change direction. Plot shows example tracks of 5 Act cells with overlaying starting point (black dot,  $t = 0$ ). **(E)** Displacement plot of CPM cells simulated with and without the Act extension. Brownian motion (without the Act model, gray line) results in a linear curve. Act cell movement appears as brownian motion on large time scales (linear part of red line), but is persistent on smaller time scales (non-linear start of red line).

## 2 Results

### 2.1 An extended Cellular Potts Model reproduces features of T cell migration

To investigate how external cues affect the cell-intrinsic coupling between speed and persistence in migrating T cells, we need a model that not only reproduces this coupling, but can also simulate realistic cell migration within the complex environments relevant to T cell biology. Such a model must provide a spatial description of the cell’s shape and interaction with its surroundings – both of which are crucial for T cell behavior *in vivo* (Beltman et al., 2007; Ariotti et al., 2012). We therefore turned to a Cellular Potts Model (CPM). CPMs represent cells as collections of pixels that move by randomly trying to add or remove pixels at their borders (“copy attempts”). While doing so, cells try to minimize the energetic cost  $\Delta H$  associated with maintaining their shape and contacts with neighbor cells (Figure 1A). This allows CPMs to reproduce realistic, dynamic cell shapes and -behavior using only a few simple rules and parameters. Their spatially explicit yet simple nature makes CPMs powerful tools for modelling the interactions of individual cells with complex, multicellular environments in a controlled setting. However, the energy that basic CPM cells try to minimize is based solely on adhesion and cell shape. As there is no energetic benefit for consistent movement in any given direction, these cells undergo brownian motion rather than migrating actively (Figure 1B).

We therefore use an extension of the CPM that does allow for active migration (Niculescu et al., 2015). In this “Act-model”, pixels newly added to a cell temporarily remember their recent protrusive activity. Copy attempts from active into less active pixels are rewarded via a negative contribution  $\Delta H_{\text{act}}$  to the cost  $\Delta H$ , inducing a positive feedback loop wherein recently added pixels become more likely to protrude again (Figure 1C). Consequently, local groups of active pixels form stable protrusions that drag the cell forward in persistent motion before disappearing again, at which point the cell stops until a new protrusion forms. Thus, cells alternate between intervals of persistent movement and “stops”, in which they can switch direction (Figure

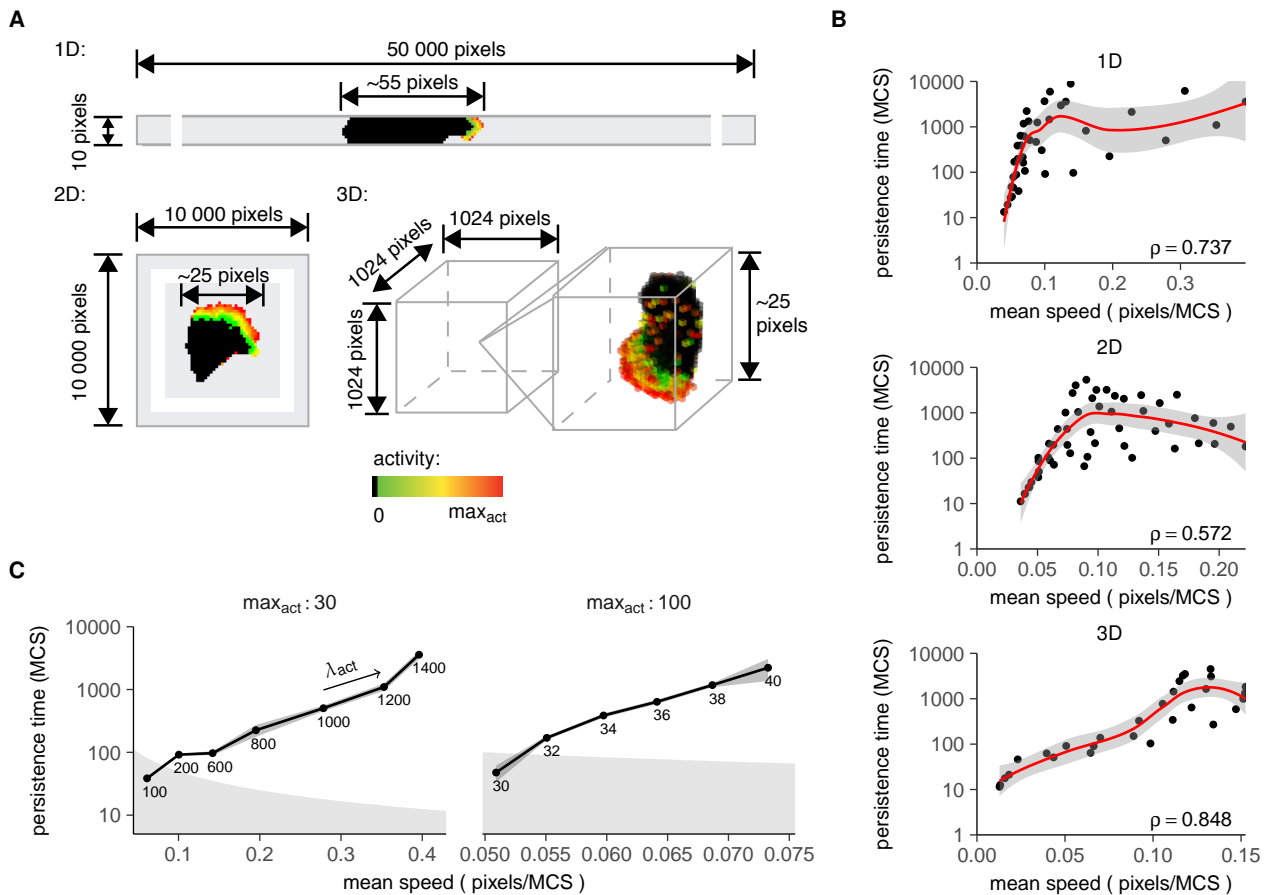

**Figure 2:** The Act model reproduces the UCSP observed in experimental data. **(A)** Set-up and example Act cells for simulations of 1D, 2D, and 3D migration. Color gradients indicate the active protrusion. Simulated microchannels (“1D” migration) consist of two parallel walls, leaving 10 pixels in between. 2D and 3D simulations were performed in an empty grid of the indicated sizes, with no external constraints on the cell shape. **(B)** Speed-persistence coupling arises in the Act model on an exponential scale. Plots show data from 1D, 2D, and 3D simulations, respectively ( $\rho$  = spearman correlation coefficient). See Materials and Methods for a list of parameters used. **(C)** Speed-persistence coupling is stronger for cells stratified by max<sub>act</sub>. Plot shows mean  $\pm$  SD of persistence time plotted against speed for Act cells migrating in microchannels (1D), grouped by value of max<sub>act</sub>; numbers in the plot indicate the corresponding value of  $\lambda_{act}$ . Shaded gray areas in the background indicate regions where the persistence time is lower than the time it takes for the cell to move 10% of its length.

98 1D). At larger time scales, movement still resembles brownian motion (new protrusions can form in random  
 99 directions). Persistence is only evident at the smaller time scales during which the cell has a stable protrusion  
 100 and maintains its direction of movement (Figure 1E).

101 This behavior qualitatively resembles the characteristic “stop-and-go” motility of T cells searching for antigen  
 102 in the lymph node (Miller et al., 2002; Beauchemin et al., 2007). Because the Act model can also simulate cell  
 103 migration within tissues (Niculescu et al., 2015), this makes it a suitable tool for modelling the effect of tissue  
 104 context on T cell migration dynamics *in silico*.

## 105 2.2 The Act model reproduces the UCSP observed in migrating cells

106 After showing that the Act model can reproduce several relevant features of T cell migration, we first tested  
 107 whether it could also reproduce the UCSP observed in experimental data. Most of these experiments involved  
 108 the migration of cells moving along adhesive tracks or within microchannels (Maiuri et al., 2012, 2015). To  
 109 mimic this “one-dimensional” experimental set-up *in silico*, we constrained Act cells between two parallel walls,  
 110 leaving a space of 10 pixels within the channel (Figure 2A). This set-up resulted in cell elongation comparable to  
 111 that observed for cells moving on 1D adhesive tracks (compare Figure 2A to Figure 1B in (Maiuri et al., 2015)).  
 112 Act cells moving in these microchannels display “stop-and-go” behavior, migrating persistently in one direction

113 until they lose their active protrusion – at which point they wait (“stop”) for a new protrusion to form and can  
114 switch direction (Figure S1A in Supplementary Material).

115 In addition, Maiuri et al also observed the UCSP for cells migrating on surfaces (“2D”) or within 3D  
116 environments (Maiuri et al., 2015). We mimicked these experiments by simulating Act cell migration on large  
117 2D and 3D grids without microchannel walls (Figure 2A). In contrast to the uniform, elongated shape observed  
118 in channels, Act cells moving in 2D and 3D form protrusions of different shapes (Niculescu et al., 2015) (Figure  
119 2A and see below).

120 We then used these different set-ups to simulate cells with different migratory behavior. Two parameters  
121 control migration in the Act model. The first,  $\lambda_{act}$ , tunes the contribution of the positive feedback  $\Delta H_{act}$  relative  
122 to the other energetic constraints (adhesion, volume, perimeter), and can be interpreted as the force exerted on  
123 the cell membrane by actin polymerization in the cell’s leading edge. When  $\lambda_{act}$  is large, this force can easily  
124 push the membrane forward to form a stable protrusion, but when it is small, the actin cytoskeleton has a hard  
125 time overcoming other, opposing forces (such as membrane tension). Higher  $\lambda_{act}$  values therefore yield larger  
126 protrusions (Figure S1B in Supplementary Material). The second parameter,  $\max_{act}$ , determines how long pixels  
127 remember their activity (measured in MCS, the time unit of the CPM). It thereby puts an upper bound on the  
128 protrusion size, and can be interpreted as the lifetime of polymerized actin. Higher  $\max_{act}$  values therefore  
129 have a stabilizing effect on the protrusions – yielding larger protrusions even at small forces  $\lambda_{act}$  (Figure S1B in  
130 Supplementary Material).

131 To simulate cells with variable migratory behavior, we generated cell tracks for Act cells with different  $\lambda_{act}$   
132 and  $\max_{act}$  values. Analysis of speed and persistence time (computed from the speed autocorrelation function,  
133 see Materials and Methods) revealed a weak exponential coupling between speed and persistence in all three  
134 settings (Figure 2B). Although the correlation was weak in these heterogeneous datasets of Act cells with highly  
135 different  $\lambda_{act}$  and  $\max_{act}$  parameters, it became much stronger when we stratified cells by  $\max_{act}$  value (Figure  
136 2C). Analysis of speed and persistence in these tracks yielded the same exponential correlation between speed  
137 and persistence that was also observed in experimental data (Maiuri et al., 2015). This finding was independent  
138 of the choice of  $\max_{act}$ , as we found similar curves for different values of  $\max_{act}$  (Figure 2C). These results  
139 demonstrate the existence of a speed-persistence coupling in the Act model.

### 140 2.3 Speed-persistence coupling in the Act model spans a range of migration modes

141 We then harnessed the spatial nature of the Act model to examine the UCSP in more detail. We focused on  
142 the 2D and 3D settings (which are less artificial than the microchannel environment and allow cells to take on  
143 their preferred shapes), and investigated how the cell’s migration mode changed when speed and persistence  
144 increased (Figure 3).

145 An important feature of the Act model is that it reproduces different cell shapes and migration modes  
146 (Niculescu et al., 2015). Low values of  $\lambda_{act}$  and  $\max_{act}$  promote the formation of small and narrow protrusions  
147 that form and decay dynamically, giving rise to an amoeboid (“stop-and-go”) migration mode (Figure 3A, left).  
148 By contrast, large values of  $\lambda_{act}$  and/or  $\max_{act}$  favor the formation of broad, stable protrusions, yielding a more  
149 persistent “keratocyte-like” migration mode (Figure 3A, right).

150 Like with the microchannel data (Figure 2C), we again found a strong exponential correlation between speed  
151 and persistence when we stratified cells by  $\max_{act}$  value (Figure 3B, Figure S2A in Supplementary Material).  
152 This time, however, the exponential increase in persistence was also accompanied by a transition from amoeboid  
153 to keratocyte-like cell shapes (insets in Figure 3B).

154 This transition between different migration modes is also visible in the distributions of the instantaneous  
155 speeds from our simulated cell tracks (Figure 3C, Figure S2B in Supplementary Material). The bimodal shape of  
156 this distribution – which is especially evident at low values of  $\max_{act}$  – reflects the “stop-and-go” behavior of  
157 migrating Act cells: when the cell is in a “stop”, it has a very low instantaneous speed of almost 0 pixels/MCS,  
158 whereas the “go” intervals of movement are responsible for the peak at a higher speed. Higher  $\lambda_{act}$  values not  
159 only increase migration speed (reflected by an upward shift of this second peak), but also reduce the amount

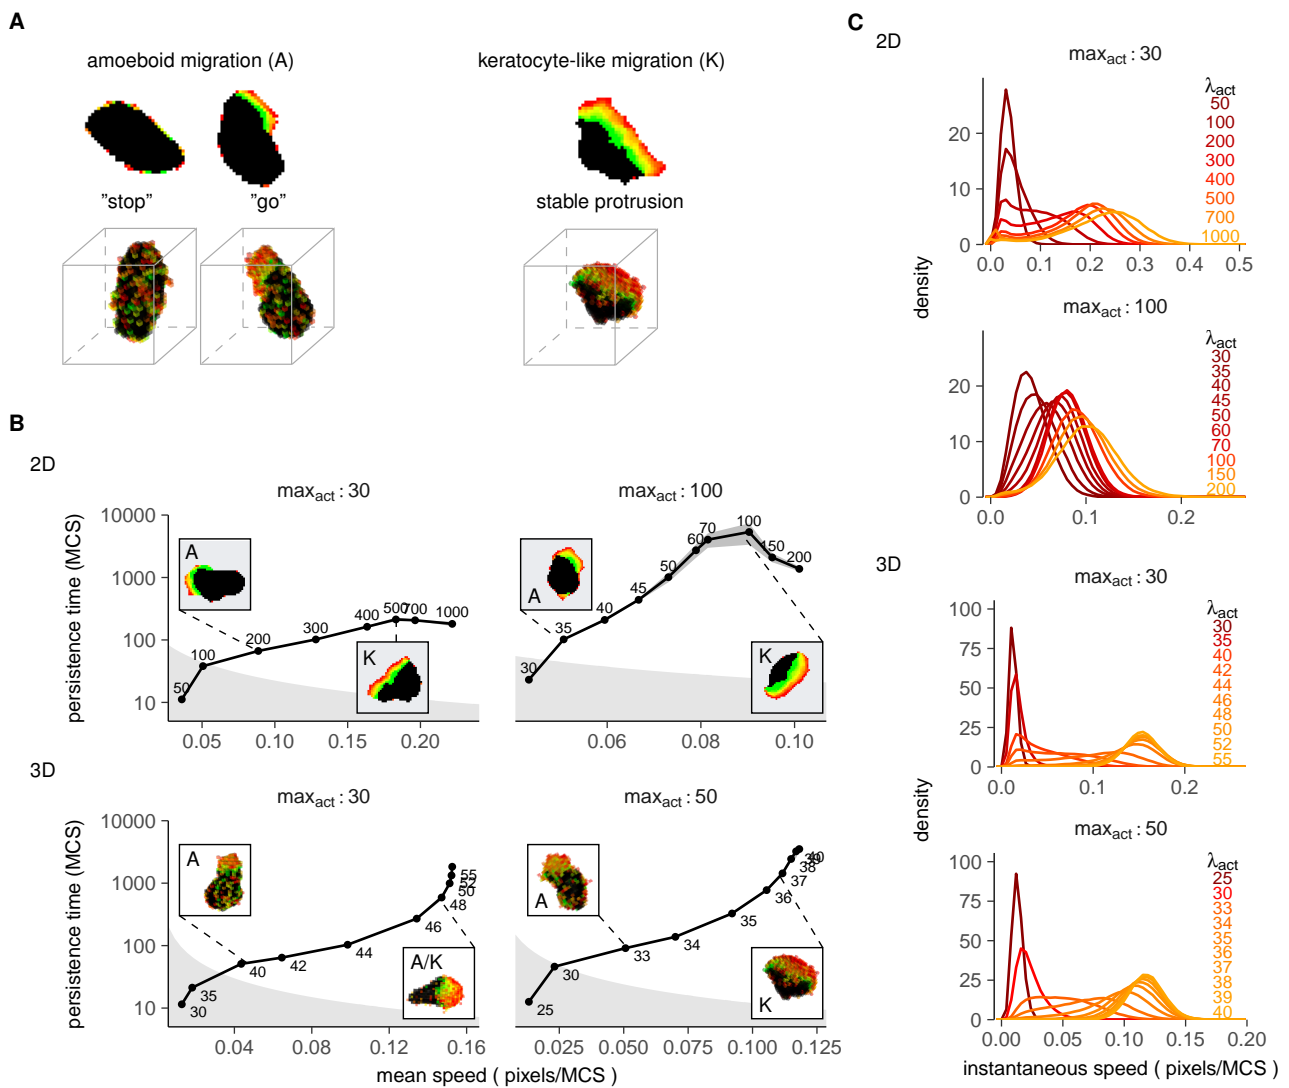

**Figure 3:** Speed-persistence coupling spans a range of migration modes. **(A)** Migration modes in the Act-model (see also (Niculescu et al., 2015)). Amoeboid cells are characterized by small, narrow protrusions that decay quickly and produce stop-and-go motion. Keratocyte-like cells are characterized by more stable, broad protrusions that do not decay easily. **(B)** Exponential speed-persistence coupling in 2D and 3D spans a transition from amoeboid to keratocyte-like motion. Plot shows mean  $\pm$  SD of persistence time plotted against speed for different combinations of  $\lambda_{act}$  and  $max_{act}$ . Insets show representative cell shapes for the indicated parameters; shaded gray background indicates regions where the persistence time is lower than the time it takes for a cell to move 10% of its length. See also Figure S2A in Supplementary Material. **(C)** Distributions of the instantaneous speeds of 2D and 3D Act cells reveal a transition through different migration regimes. Cells go from not moving (single peak at speed  $\sim 0$  pixels/MCS), via "stop-and-go" motility (bimodal distributions), to near-continuous movement (single peak at high speed). See also Figure S2B in Supplementary Material.

160 of time a cell spends in "stops" (reflected by a decrease in the size of the first peak). As stops provide an  
 161 opportunity for the cell to change its direction (Figure 3A), the reduced "stopping time" at high  $\lambda_{act}$  values  
 162 explains why Act cells with high  $\lambda_{act}$  values migrate not only faster, but also more persistently.

163 Together, these results demonstrate that the exponential speed-persistence coupling holds across different  
 164 "regimes" of migration. At very low  $\lambda_{act}$ , the cell barely moves at all – as indicated by a single peak at  
 165 instantaneous speeds of almost zero (Figure 3C). This corresponds to a cell without protrusions, spending most  
 166 of its time in "stops". As  $\lambda_{act}$  increases, the cell enters a "stop-and-go", amoeboid migration regime (bimodal  
 167 distributions), until finally it takes on a keratocyte-like shape and almost never stops moving at the highest  $\lambda_{act}$   
 168 values.

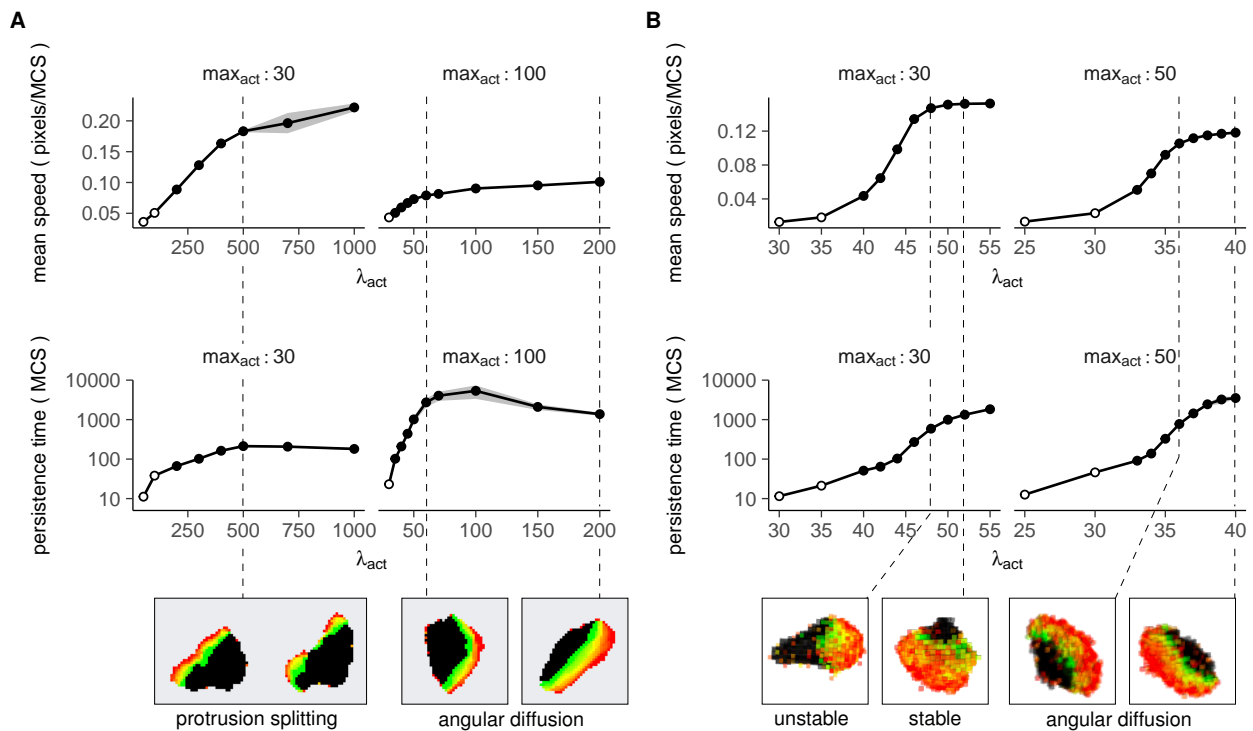

**Figure 4:** Cell shape dynamics limit both the speed and persistence of migrating cells. Mean  $\pm$  SD of speed and persistence time of (A) 2D and (B) 3D Act cells, plotted against  $\lambda_{act}$  for different values of  $max_{act}$ . Open circles indicate points where the persistence time is lower than the time it takes the cell to move 10% of its length (corresponding to the points in the gray background in Figure 3B). Insets show cell shapes at the indicated parameter values.

## 2.4 Both Act cell speed and persistence saturate in a cell shape-dependent manner

Interestingly, our data also show the saturation of the persistence at higher cell speeds that was also reported in the experimental data (compare the 2D figures in Figure 3B to the data in (Maiuri et al., 2015)). In fact, this saturation was not limited to persistence. Whereas speed initially increased linearly with  $\lambda_{act}$ , it plateaued at higher  $\lambda_{act}$  values (Figure 4A,B, Figure S2C in Supplementary Material). The maximum speed reached depended on the protrusion shape-parameter  $max_{act}$ , but in all cases, the initial linear part of the graph spanned the entire transition from amoeboid to a keratocyte-like shape. This finding suggests that having to maintain a broad protrusion limits the speed a cell can reach. In line with this idea, we did not observe this saturation in microchannels, which prevent the cell from acquiring the broad protrusions observed in 2D and 3D (Figure S3A in Supplementary Material).

Similarly, the cell shape changes observed in 2D and 3D seem to put an upper bound on persistence that disappears when the cell is constrained by a microchannel (Figure 4A,B, Figure S2C, S3B in Supplementary Material). The initial exponential increase in persistence again spanned the entire transition from amoeboid to keratocyte protrusion shapes, before eventually saturating at a  $max_{act}$ -dependent value. Also this phenomenon seems to be linked to protrusion shapes. Whereas cells with low  $max_{act}$  do tend to form keratocyte-like protrusions at high  $\lambda_{act}$  values, these protrusions do not extend far into the cell and are prone to breaking – forcing the cell to turn towards one of the protrusion halves (Figure 4A). Although higher  $max_{act}$  values allow larger persistence times by letting broad protrusions extend farther into the cell and preventing them from breaking (Figure 4A,B), persistence still saturates eventually due to slight, stochastic turning within the general direction of the stable protrusion (“angular diffusion”, Figure 4A,B) (Maiuri et al., 2015).

By showing how the shape of migrating cells puts a natural upper bound on both the speed and the persistence a cell can reach, these results explain the saturation of persistence observed by Maiuri et al (Maiuri et al., 2015). However, there was a striking effect of dimensionality on this process: although we observed shape-driven saturation in both 2D and 3D, the shape of the speed-persistence curve was different for 2D and

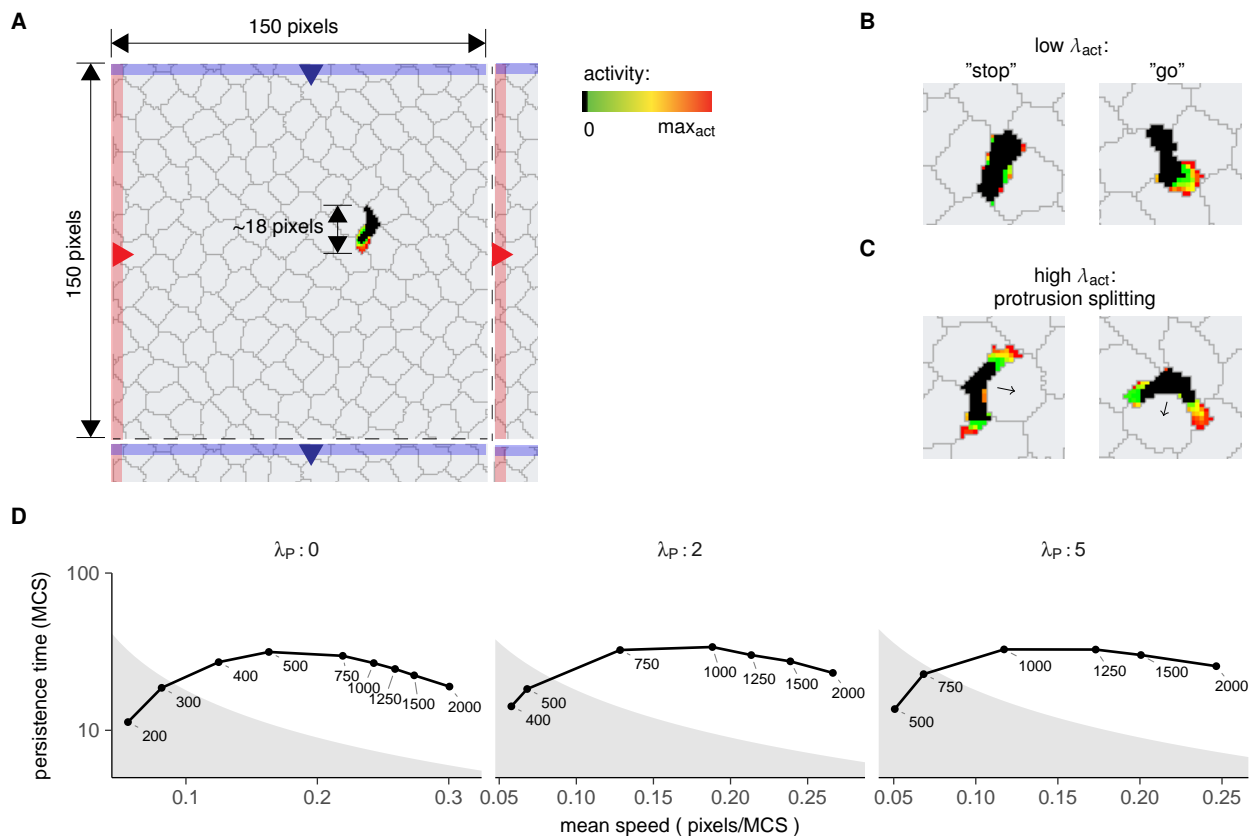

**Figure 5:** Environmental constraints limit T cell persistence in a model of the epidermis. **(A)** An Act T cell (black) moving in between keratinocytes (gray) in the epidermis. Simulations were performed in a 150 x 150 pixel grid with linked borders (for example, a cell moving off the grid towards the red region on the right re-enters the grid at the equivalent red region on the left). **(B,C)** Shapes of Act T cells constrained between keratinocytes. At lower  $\lambda_{act}$  values, T cells show typical amoeboid "stop-and-go" behavior. At higher  $\lambda_{act}$  values, cells do not obtain a broad, keratocyte-like shape, but stay elongated due to environmental constraints. At junctions between keratinocytes, however, protrusions tend to split. **(D)** Mean persistence time plotted against speed for different combinations of  $\lambda_{act}$  and the keratinocyte rigidity parameter  $\lambda_P$  ( $\max_{act} = 20$ ). Shaded gray background indicates regions where the persistence time is lower than the time it takes for a cell to move 10% of its length.

193 3D simulations (Figure 3B, 4). In both settings, speed and persistence saturated after an initial linear/exponential  
 194 increase with  $\lambda_{act}$ . Yet, whereas persistence saturated before speed in 2D (Figure 4A), 3D Act cells showed a  
 195 much stronger saturation of speed that preceded the saturation of persistence (Figure 4B). Thus, when both  
 196 speed and persistence have a natural upper bound, the dominant saturation effect can be context-dependent –  
 197 altering the shape of the speed-persistence curve.

## 198 2.5 Environmental constraints break the UCSP for T cell migration in the epidermis

199 After validating that the Act model robustly reproduces the UCSP, we applied this model to study our original  
 200 question of how a crowded environment affects the speed and persistence of migrating T cells. Specifically, we  
 201 modelled T cell migration in the epidermal layer of the skin. As one of the key entry points through which  
 202 pathogens can enter the body, even healthy skin contains substantial numbers of T cells (Clark et al., 2006).  
 203 T cells attracted to the epidermis during an infection can remain there for a long time: even a year after the  
 204 resolution of an infection, specific T cells still persist in the same region of the epidermis (Gebhardt et al., 2009,  
 205 2011; Jiang et al., 2012; Zaid et al., 2014). Whereas subtle chemotaxis guides T cells towards infected cells  
 206 during the effector phase (Ariotti et al., 2015), these remaining T cells actively patrol the epidermis without  
 207 such chemotactic guidance (Ariotti et al., 2012) – migrating in patterns shaped by a combination of cell-intrinsic  
 208 factors and environmental constraints. Importantly, even though the tight contacts between keratinocytes  
 209 make the epidermis one of the most rigid environments T cells encounter *in vivo*, T cells in the epidermis are



210 nevertheless highly motile (Ariotti et al., 2012).

211 We therefore focused on this extreme example to examine how environmental structure can affect the UCSP.  
212 To this end, we simulated T cell migration in the skin as reported previously (Niculescu et al., 2015), placing an  
213 Act cell in a grid covered completely with keratinocytes (Figure 5A). Because of the opposing forces from the  
214 surrounding keratinocytes, cells now required higher  $\lambda_{act}$  forces to counter this resistance and start moving  
215 (Figure S4 in Supplementary Material). At sufficiently high  $\lambda_{act}$  values, they once again showed the characteristic  
216 “stop-and-go” motility before eventually switching to near-constant motion with hardly any stops (Figure 5B,  
217 Figure S4 in Supplementary Material).

218 Unlike Act cells in an unconstrained environment, these Act T cells did not switch from amoeboid to  
219 keratocyte-like cell shapes as  $\lambda_{act}$  increased. Cells at high  $\lambda_{act}$  now mostly maintained their amoeboid shape,  
220 probing their surroundings with narrow protrusions and migrating in the direction of their longest axis.  
221 However, when these cells approached a “T-junction” (Figure 5C), they sometimes formed a broad protrusion  
222 in the space between the keratinocytes that eventually split up into two separate protrusions going in opposite  
223 directions. This protrusion splitting caused the cell to slow down until one of the two active regions gained the  
224 upper hand.

225 In this set-up, increases in  $\lambda_{act}$  were once again associated with a higher speed that gradually saturated at high  
226  $\lambda_{act}$  values (Figure S5A in Supplementary Material), but persistence times now saturated much earlier, reaching  
227 a plateau at  $\sim 30$  MCS (Figure S5B in Supplementary Material). With cell speeds around  $\sim 0.2$  pixels/MCS, this  
228 corresponds to persistent movement over distances in the range of  $\sim 5$ -10 pixels – which is roughly the distance  
229 the T cell can travel before arriving at another junction (Figure 5A). Thus, the structure of the environment  
230 appears to be the limiting factor for T cell persistence in this scenario.

231 This rapid saturation of persistence overruled the UCSP for T cells migrating in the skin, abrogating the  
232 coupling of speed and persistence (Figure 5D). This result was independent of the rigidity of the surrounding  
233 keratinocytes: although a reduction in the keratinocyte rigidity parameter  $\lambda_p$  increased the speeds that T cells  
234 could reach (Figure S5A in Supplementary Material), it did not affect the maximum persistence time (Figure S5B  
235 in Supplementary Material) or the absence of speed-persistence coupling (Figure 5D). These results demonstrate  
236 that although the UCSP appears to be valid for all migrating cells, cell-intrinsic speed-persistence coupling may  
237 be obscured when environmental factors place additional, more stringent constraints on persistence.

### 238 3 Discussion

239 To date, the UCSP remains the only general law describing cell motility across the complete spectrum of  
240 migrating cell types. Given the incredible diversity of the mechanisms driving cell migration in different cell  
241 types, it is not straightforward that such a general law should exist at all. Nevertheless, the UCSP is now firmly  
242 established: after its initial discovery (Maiuri et al., 2012), Wu et al later confirmed the UCSP in an independent  
243 study (Wu et al., 2014), and Maiuri et al explained it by showing that actin retrograde flow can mechanically  
244 couple cell polarity to migration speed (Maiuri et al., 2015). Here, we again confirm this fundamental law of cell  
245 migration in an independent model and show – for the first time – how it relates to cell shape dynamics and  
246 environmental constraints.

247 The mathematical model of the UCSP described by Maiuri et al differs from the Act model in the level of  
248 detail used to describe cell polarity and cell shape. The Maiuri model treats the cell as a line along its length axis –  
249 describing describes both polarity molecule concentrations and actin retrograde flow only in this one dimension  
250 – and lacks a more detailed description of the cell shape and shape dynamics. By contrast, the Act model  
251 does reproduce realistic cell shapes and shape dynamics (Niculescu et al., 2015). Although it lacks an explicit  
252 description of the actin retrograde flow, it nevertheless reproduces the exponential speed-persistence coupling  
253 observed in the Maiuri model and in experimental data. Similar to the experimental data, this association  
254 is weak in heterogeneous cell populations – but becomes stronger when cells are stratified into more similar  
255 groups (in this case, by  $\max_{act}$  value) (Figure 2B,C, 3B).

256 Because the Act model provides a more detailed description of cell shape than the Maiuri model, it allowed  
257 us to investigate how the UCSP interacts with cell shape dynamics. Firstly, our data show that speed-persistence  
258 coupling spans a transition between different cell shapes and migration modes (Figure 3). This finding highlights  
259 that cell shape and cell motility characteristics interact – consistent with several other studies showing a link  
260 between cell shape and speed within individual cell types (Keren et al., 2008; Ofer et al., 2011; Tweedy et al., 2013).  
261 Secondly, the model demonstrates that cell shape puts an upper bound on migratory speed and persistence:  
262 both saturated at high  $\lambda_{act}$  levels where the cell had attained a broader, more keratocyte-like shape (Figure  
263 4). Interestingly, a similar shape-speed correlation with saturation at broad cell shapes was found in fish  
264 keratocytes (Keren et al., 2008). These observations clearly show that not only persistence, but also cell speed  
265 has a natural upper bound determined at least partly by cell shape dynamics. We also show an important role  
266 for dimensionality in this process, as the saturation of speed and persistence behaved differently in 2D versus  
267 3D. Together, these results shed new light on the saturation of persistence observed in the experimental data:  
268 whereas persistence saturated before speed in all experimental settings considered by Maiuri et al (Maiuri et al.,  
269 2015), our model suggests that – depending on the cell’s shape – scenarios in which speed saturates earlier could  
270 likewise exist.

271 In our *in silico* model of T cell migration in the epidermis, environmental constraints posed by the  
272 dense keratinocyte layer restricted persistent movement and obscured the UCSP (Figure 5) – showing that  
273 environmental constraints can overrule the UCSP in at least some of the environments T cells face *in vivo*.  
274 We therefore predict that speed-persistence coupling should not be visible in *in vivo* imaging data of T cells  
275 patrolling the epidermis: in such an environment, both speed and persistence likely reflect the maximum of  
276 what is feasible given the environmental constraints rather than being the result of an intrinsic coupling.

277 It is worth noting here that the epidermis is an extreme example of a confining environment, and that other  
278 tissues likely place less stringent constraints on T cell movement. This would allow a more important role for  
279 the UCSP in determining persistence in such tissues. Interestingly, thymocytes navigating the thymic cortex  
280 during positive selection perform a random walk at a low speed – whereas the same region also contains a  
281 population of cells with much higher speed and persistence, representing the cells that have already completed  
282 positive selection (Witt et al., 2005; Halkias et al., 2013). This finding shows that the slow-moving population of  
283 thymocytes still undergoing positive selection has not yet reached the maximal speed and persistence permitted  
284 by the environment – suggesting a role for the UCSP in this context. Future studies should elucidate whether  
285 the UCSP indeed applies in cortical thymocytes.

286 Our results have implications for studies investigating the efficiency of T cell search behavior. Motility  
287 characteristics such as speed and persistence are not independent parameters that can be tuned to generate  
288 “optimal” search behavior, but rather reflect a complex interplay between cell-intrinsic rules such as the UCSP  
289 and the topology of the environment. Random walk models of T cell search strategies should therefore consider  
290 that speed and persistence are subject to both cell-intrinsic and environmental constraints. As different models  
291 can often explain the same data, understanding these constraints will be crucial to select those models that are  
292 not only consistent with data, but represent search strategies that T cells might actually adopt *in vivo*.

## 293 4 Materials and Methods

### 294 4.1 Act model

295 For our simulations, we used the Act model as described in (Niculescu et al., 2015). Our JavaScript implementation  
296 of this model is available at <http://github.com/jttextor/cpm>.

297 Briefly, the Act model is an extension of the Cellular Potts Model that represents cells as collections of pixels  
298 on a 2D or 3D grid. These pixels randomly try to copy their cell's identity into neighbor pixels belonging to other  
299 cells. The probability that such a copy attempt will succeed depends on the global energy or Hamiltonian of the  
300 system, which is in turn determined by cell-cell adhesion and constraints on the cell's volume and perimeter.  
301 The success probability of a copy attempt therefore not only depends on the cell's shape, but also on that of  
302 the cell that it tries to copy into. Time in the CPM is measured in Monte Carlo Steps (MCS), where one MCS  
303 contains a number of copy attempts equal to the total number of pixels in the grid.

304 The Act model extends the CPM with positive feedback, such that pixels that were recently added to a cell  
305 (= recent "protrusive" activity) remember this activity for a period of  $\max_{\text{act}}$  MCS – during which they become  
306 more likely to protrude again. This is accomplished via a negative contribution  $\Delta H_{\text{act}}$  to the Hamiltonian for all  
307 copy attempts from a source pixel  $s$  in an active region into a target pixel  $t$  in a less active region:

$$\Delta H_{\text{act}}(s \rightarrow t) = -\frac{\lambda_{\text{act}}}{\max_{\text{act}}}(\text{GM}_{\text{act}}(s) - \text{GM}_{\text{act}}(t)) \quad (1)$$

308 where  $\text{GM}_{\text{act}}(p)$  of pixel  $p$  is the geometric mean of the activity values of all pixels in the (Moore) neighborhood  
309 of  $p$ . Thus,  $\Delta H_{\text{act}}$  is negative when  $\text{GM}_{\text{act}}(s) > \text{GM}_{\text{act}}(t)$ .

310 For a complete description of the CPM, see (Niculescu et al., 2015). For details on parameters used, see  
311 section 4.2 below.

### 312 4.2 Simulations

313 Before the start of each simulation, cells were seeded in the middle of the grid and allowed a burnin time of  
314 500 MCS to gain their optimal volume and shape. Every cell centroid was then tracked for a period of 50,000  
315 MCS. To maximize measurement resolution while still allowing the cells to displace enough for an accurate  
316 determination of movement direction, cell centroids were recorded every 5 MCS.

#### 317 4.2.1 Basic CPM parameters

318 For each experiment, we selected parameters combinations where cells had realistic shapes and migration  
319 behavior (see Table 1). Temperature, volume, perimeter, adhesion, and  $\lambda_V/\lambda_P$  were chosen such that cells stayed  
320 connected even at high  $\max_{\text{act}}$  and  $\lambda_{\text{act}}$  values tested ("connectedness" at least 95% for at least 95% of the time  
321 for all simulations except skin simulations. See section "Connectedness" below). Except for  $\max_{\text{act}}$  and  $\lambda_{\text{act}}$ ,  
322 parameters were held constant within each experiment. Parameters for 1D and 2D simulations were mostly  
323 equal – except for the larger perimeter in 1D to account for the elongated shape of cells in microchannels. For  
324 3D simulations, however, we had to select other parameters to account for changes in surface to volume ratio  
325 and thus altered relative contributions of the different terms to the total  $\Delta H$ .

#### 326 4.2.2 Act model parameters

327 To investigate the link between speed and persistence, we analyzed cell tracks with increasing  $\lambda_{\text{act}}$  while keeping  
328  $\max_{\text{act}}$  fixed (Table 2).  $\max_{\text{act}}$  values were chosen to obtain a range of protrusion sizes, from small protrusions to  
329 large protrusions occupying most – but not all – of the cell volume (see percentage active pixels analysis below).  
330 For each  $\max_{\text{act}}$ , a range of  $\lambda_{\text{act}}$  values was then chosen such that cells went from completely brownian motion  
331 (persistence time  $\sim 5$  MCS, the time between subsequent measurements of cell location) to maximally persistent  
332 motion (persistence time  $\sim 10,000$  MCS). Persistence times higher than 10,000 MCS were not considered, as such

**Table 1:** CPM parameters used in different experiments. Within each experiment, parameters were kept constant. Skin simulation parameters apply to the T cells; bracketed parameters indicate values used for the keratinocytes.

|                                     | 1D         | 2D            | 3D                 | Skin      |
|-------------------------------------|------------|---------------|--------------------|-----------|
| <b>Grid size (pixels)</b>           | 50000 x 12 | 10000 x 10000 | 1024 x 1024 x 1024 | 150 x 150 |
| <b>Linked grid borders</b>          | no         | no            | no                 | yes       |
| <b>Simulation duration (MCS)</b>    | 50000      | 50000         | 50000              | 50000     |
| <b>Burnin time (MCS)</b>            | 500        | 500           | 500                | 500       |
| <b>Temperature</b>                  | 20         | 20            | 7                  | 20        |
| <b>Volume (pixels)</b>              | 500        | 500           | 1800               | 100 (152) |
| $\lambda_{\text{Volume}}$           | 30         | 30            | 25                 | 30 (30)   |
| <b>Perimeter</b>                    | 360        | 260           | 8600               | 130 (145) |
| $\lambda_{\text{Perimeter}}$        | 2          | 2             | 0.01               | 2 (0/2/5) |
| <b>Adhesion cell-channel</b>        | 15         | -             | -                  | -         |
| <b>Adhesion cell-ECM</b>            | 20         | 20            | 5                  | 20 (20)   |
| <b>Adhesion cell-cell</b>           | 100        | 100           | 15                 | 20 (20)   |
| <b>Adhesion T cell-keratinocyte</b> | -          | -             | -                  | 100       |

**Table 2:** Combinations of  $\max_{\text{act}}$  and  $\lambda_{\text{act}}$  used in different experiments. For each  $\max_{\text{act}}$ ,  $\lambda_{\text{act}}$  values were chosen such that cells went from no persistence to maximal persistence.

| Experiment | $\max_{\text{act}}$ | $\lambda_{\text{act}}$                          |
|------------|---------------------|-------------------------------------------------|
| 1D         | 30                  | 100, 200, 600, 800, 1000, 1200, 1400            |
|            | 40                  | 60, 80, 100, 200, 400, 600                      |
|            | 50                  | 50, 60, 70, 80, 90, 95, 100                     |
|            | 60                  | 40, 45, 50, 55, 60, 65, 70                      |
|            | 80                  | 25, 30, 35, 38, 40, 42, 45                      |
|            | 100                 | 30, 32, 34, 36, 38, 40                          |
| 2D         | 30                  | 50, 100, 200, 300, 400, 500, 700, 1000          |
|            | 40                  | 50, 75, 100, 150, 200, 250, 300, 500, 800, 1000 |
|            | 50                  | 50, 75, 100, 125, 150, 200, 300, 500            |
|            | 60                  | 40, 60, 80, 100, 120, 150, 250                  |
|            | 80                  | 30, 40, 50, 60, 70, 100, 150, 200               |
|            | 100                 | 30, 35, 40, 45, 50, 60, 70, 100, 150, 200       |
| 3D         | 30                  | 30, 35, 40, 42, 44, 46, 48, 50, 52, 55          |
|            | 40                  | 30, 35, 37, 38, 39, 40, 42, 45, 50              |
|            | 50                  | 25, 30, 33, 34, 35, 36, 37, 38, 39, 40          |

333 high persistences will likely be underestimated due to the finite total simulation time (50,000 MCS). For skin  
 334 simulations, keratinocytes were modelled with  $\max_{\text{act}} = \lambda_{\text{act}} = 0$ , and variable  $\lambda_P$ , T cells with  $\max_{\text{act}} = 20$  and  
 335 variable  $\lambda_{\text{act}}$  (Table 3).

### 336 4.2.3 Microchannel simulations

337 To simulate migration of cells confined in a 1D microchannel, we created a 2D grid with a height of 10 pixels  
 338 and a width of 50,000 pixels. Cells were confined by a layer of "barrier" pixels on the top and bottom of the grid,  
 339 into which copy attempts were forbidden (yielding a total grid height of 12 pixels). Cells were seeded in the  
 340 middle of the channel for each simulation.

**Table 3:** Combinations of keratinocyte  $\lambda_P$  and T cell  $\lambda_{\text{act}}$  used in the skin simulations.

| Experiment | $\lambda_P$ | $\lambda_{\text{act}}$                          |
|------------|-------------|-------------------------------------------------|
| skin       | 0           | 200, 300, 400, 500, 750, 1000, 1250, 1500, 2000 |
|            | 2           | 400, 500, 750, 1000, 1250, 1500, 2000           |
|            | 5           | 500, 750, 1000, 1250, 1500, 2000                |

#### 341 4.2.4 2D and 3D simulations

342 To simulate migration in 2D and 3D, we seeded single cells in the middle of an empty 2D (10,000 x 10,000 pixels)  
343 or 3D (1024 x 1024 x 1024 pixels) grid, respectively.

### 344 4.3 Analysis of cell shape and protrusions

345 During each simulation (every 5 MCS), we recorded not only the position of the cell's centroid, but also several  
346 other cell properties to keep track of the cell's shape and degree of polarization (see below).

#### 347 4.3.1 Connectedness

348 In the CPM, the pixels belonging to a single cell are held together mostly via the adhesion term in the Hamiltonian,  
349 which favours cell shapes where pixels belonging to the same cell adhere to each other. However, this adhesive  
350 force can become negligible relative to the other  $\Delta H$  terms – for example when  $\Delta H_{\text{act}}$  is large due to a high  
351  $\lambda_{\text{act}}$ . Thus – especially in 3D – cells may break apart at high values of  $\lambda_{\text{act}}$ , despite the unfavourable changes in  
352 adhesion energy associated with this break.

353 As frequent cell breaking causes artefacts in the tracking data that may bias the measurement of speed and  
354 persistence, it is important to use parameter ranges that prevent such an unbalanced contribution of the different  
355  $\Delta H$  terms. To estimate the frequency of cell breaking, we therefore recorded the *connectedness* ( $C$ ) of the cell  
356 every 5 MCS of each simulation.

357  $C$  represents the probability that two randomly chosen pixels from the same cell are part of a single, unbroken  
358 unit. To compute  $C_i$  of a cell  $i$ , we represent the cell  $i$  as a graph  $G_i$  where every node  $p$  is a pixel belonging to  
359 cell  $i$ , and pixels are connected by an edge if they are adjacent to each other on the CPM grid (that is, if they are  
360 from the same Moore neighborhood). We then group the pixels into  $n$  *connected components*  $[c_1, \dots, c_n]$  – that is,  
361 groups of pixels where for every pair of pixels  $(p_1 \in c, p_2 \in c)$ , it is possible to walk from  $p_1$  to  $p_2$  via the edges of  
362 graph  $G_i$ . We then define  $C_i$  as:

$$C_i = \sum_{k=1}^n \left( \frac{V_k}{V_i} \right)^2 \quad (2)$$

363 where  $V_k$  is the pixel volume of connected component  $c_k$  in  $G_i$ , and  $V_i$  the total volume of cell  $i$ . Thus, an  
364 unbroken cell – which by definition has only one connected component – has  $C_i = 1$ , whereas a cell broken into  
365 many isolated pixels has  $C_i \rightarrow 0$ .

#### 366 4.3.2 Percentage active pixels

367 As a measure of the size of the active protrusion of a cell, we counted the percentage of pixels of that cell with an  
368 Act-model activity  $> 0$ .

### 369 4.4 Track analysis

370 All simulated cell tracks were analyzed in R (version 3.4.3) using the MotilityLab package (version 0.2.5). To  
371 compute speed and persistence, we performed step-based analyses on 4 groups of 5 simulated tracks (see  
372 below), yielding 4 estimates of speed and persistence for every parameter combination. These four values were  
373 then used to estimate the overall value (mean) and measurement precision (standard deviation) of speed and  
374 persistence at that parameter combination.

#### 375 4.4.1 Speed

376 To compute speeds, we first computed instantaneous speeds at every step in every cell track (using the "speed"  
377 function of MotilityLab). The reported mean speed was then the average of all the instantaneous speeds in the  
378 recorded tracks.

#### 379 4.4.2 Persistence

380 To measure the persistence of a moving cell, consider the vectors  $\vec{v}_{(t)}$  (movement direction at time  $t$ ) and  $\vec{v}_{(t+\Delta t)}$   
381 (movement direction at time  $t + \Delta t$ ). When the cell moves persistently, we expect that the direction of movement  
382 at  $t + \Delta t$  is similar to that at  $t$ , even for relatively large values of  $\Delta t$ . By contrast, for a cell undergoing random  
383 Brownian motion, the direction of  $\vec{v}_{(t+\Delta t)}$  is probably unrelated to that of  $\vec{v}_{(t)}$ .

384 To quantify this, consider the dot product between the movement vectors  $\vec{v}_t$  and  $\vec{v}_{t+\Delta t}$ :

$$\vec{v}_{(t)} \cdot \vec{v}_{(t+\Delta t)} \stackrel{\text{def}}{=} \|\vec{v}_{(t)}\| \|\vec{v}_{(t+\Delta t)}\| \cos \theta \quad (3)$$

385 Here,  $\cos \theta$  of the angle between vectors  $\vec{v}_{(t)}$  and  $\vec{v}_{(t+\Delta t)}$  is 1 when the vectors align perfectly ( $\theta = 0$ ), -1 when  
386 they are exactly opposite ( $\theta = 180$ ), and somewhere in between for all other angles. When we take  $\Delta t = 0$ ,  
387 equation 3 simplifies to:

$$\vec{v}_{(t)} \cdot \vec{v}_{(t+\Delta t)} = \vec{v}_{(t)} \cdot \vec{v}_{(t)} = \|\vec{v}_{(t)}\| \|\vec{v}_{(t)}\| \cos 0 = \|\vec{v}_{(t)}\|^2 \quad (4)$$

388 As  $\|\vec{v}_{(t)}\|$  equals the instantaneous speed at time  $t$ , the average of this dot product for different values of  $t$   
389 with  $\Delta t = 0$  is just the squared mean speed  $\bar{v}^2$ .

390 However, when we increase  $\Delta t$ , the vectors  $\vec{v}_{(t)}$  and  $\vec{v}_{(t+\Delta t)}$  are no longer perfectly aligned, and their dot  
391 product becomes smaller. The rate at which this decay occurs depends on the motility mode of a cell: for a  
392 given  $\Delta t$ , persistent cells will on average have a smaller  $\theta$  and thus a larger dot product than cells undergoing  
393 Brownian motion. Thus, to compute persistence, we first construct the *autocovariance curve* of the average  
394 dot product  $\vec{v}_{(t)} \cdot \vec{v}_{(t+\Delta t)}$  as a function of  $\Delta t$  (using the "overallDot" function of the MotilityLab package). As a  
395 measure of persistence, we then compute the half-life  $\tau$  of this autocovariance curve for which:

$$\frac{\vec{v}_{(t)} \cdot \vec{v}_{(t+\tau)}}{\vec{v}_{(t)} \cdot \vec{v}_{(t+0)}} = \frac{\|\vec{v}_{(t)}\| \|\vec{v}_{(t+\tau)}\| \cos \theta}{\|\vec{v}_{(t)}\|^2} = 0.5 \quad (5)$$

396 As the dot product decays more slowly for more persistent cells, high values of  $\tau$  indicate persistent  
397 movement. Note that, as the *average*  $\|\vec{v}_{(t)}\| \|\vec{v}_{(t+\tau)}\| = \|\vec{v}_{(t)}\|^2 = \bar{v}^2$ ,  $\tau$  is independent of the mean speed  $\bar{v}$ , even  
398 though the dot product is not.

### 399 Conflict of Interest Statement

400 The authors declare that the research was conducted in the absence of any commercial or financial relationships  
401 that could be construed as a potential conflict of interest.

### 402 Author Contributions

403 IW, IN, NG, RdB, and JT designed the research. IW, IN, and MK performed simulations and analyzed the data.  
404 IW and JT wrote the paper; NG and RB critically revised the manuscript.

### 405 Funding

406 IW was supported by a Radboudumc PhD grant. JT was supported by a Young Investigator Grant (10620) from  
407 KWF Kankerbestrijding.

## 408 References

- 409 Ariotti, S., Beltman, J. B., Borsje, R., Hoekstra, M. E., Halford, W. P., Haanen, J. B. A. G., et al. (2015). Subtle  
410 CXCR3-Dependent Chemotaxis of CTLs within Infected Tissue Allows Efficient Target Localization. *The*  
411 *Journal of Immunology* 195, 5285–5295. doi:10.4049/jimmunol.1500853
- 412 Ariotti, S., Beltman, J. B., Chodaczek, G., Hoekstra, M. E., Beek, A. E. v., Gomez-Eerland, R., et al. (2012).  
413 Tissue-resident memory CD8<sup>+</sup> T cells continuously patrol skin epithelia to quickly recognize local antigen.  
414 *Proceedings of the National Academy of Sciences* 109, 19739–19744. doi:10.1073/pnas.1208927109
- 415 Bajnoff, M., Egen, J. G., Koo, L. Y., Laugier, J. P., Brau, F., Glaichenhaus, N., et al. (2006). Stromal Cell  
416 Networks Regulate Lymphocyte Entry, Migration, and Territoriality in Lymph Nodes. *Immunity* 25, 989–1001.  
417 doi:10.1016/j.immuni.2006.10.011
- 418 Beauchemin, C., Dixit, N. M., and Perelson, A. S. (2007). Characterizing T Cell Movement within Lymph Nodes  
419 in the Absence of Antigen. *The Journal of Immunology* 178, 5505–5512. doi:10.4049/jimmunol.178.9.5505
- 420 Beltman, J. B., Mare, A. F. M., Lynch, J. N., Miller, M. J., and Boer, R. J. d. (2007). Lymph node topology dictates T  
421 cell migration behavior. *Journal of Experimental Medicine* 204, 771–780. doi:10.1084/jem.20061278
- 422 Borgne, M. L., Ladi, E., Dzhagalov, I., Herzmark, P., Liao, Y. F., Chakraborty, A. K., et al. (2009). The impact of  
423 negative selection on thymocyte migration in the medulla. *Nature Immunology* 10, 823–830. doi:10.1038/ni.1761
- 424 Bnichou, O., Loverdo, C., Moreau, M., and Voituriez, R. (2011). Intermittent search strategies. *Reviews of Modern*  
425 *Physics* 83, 81–129. doi:10.1103/RevModPhys.83.81
- 426 Chupeau, M., Bnichou, O., and Voituriez, R. (2015). Cover times of random searches. *Nature Physics* 11, 844–847.  
427 doi:10.1038/nphys3413
- 428 Clark, R. A., Chong, B., Mirchandani, N., Brinster, N. K., Yamanaka, K.-i., Dowgiert, R. K., et al. (2006). The  
429 Vast Majority of CLA<sup>+</sup> T Cells Are Resident in Normal Skin. *The Journal of Immunology* 176, 4431–4439.  
430 doi:10.4049/jimmunol.176.7.4431
- 431 Gebhardt, T., Wakim, L. M., Eidsmo, L., Reading, P. C., Heath, W. R., and Carbone, F. R. (2009). Memory T cells  
432 in nonlymphoid tissue that provide enhanced local immunity during infection with herpes simplex virus.  
433 *Nature Immunology* 10, 524–530. doi:10.1038/ni.1718
- 434 Gebhardt, T., Whitney, P. G., Zaid, A., Mackay, L. K., Brooks, A. G., Heath, W. R., et al. (2011). Different patterns  
435 of peripheral migration by memory CD4<sup>+</sup> and CD8<sup>+</sup> T cells. *Nature* 477, 216–219. doi:10.1038/nature10339
- 436 Germain, R. N., Robey, E. A., and Cahalan, M. D. (2012). A Decade of Imaging Cellular Motility and Interaction  
437 Dynamics in the Immune System. *Science* 336, 1676–1681. doi:10.1126/science.1221063
- 438 Halkias, J., Melichar, H. J., Taylor, K. T., Ross, J. O., Yen, B., Cooper, S. B., et al. (2013). Opposing chemokine  
439 gradients control human thymocyte migration in situ. *The Journal of Clinical Investigation* 123, 2131–2142.  
440 doi:10.1172/JCI67175
- 441 Jiang, X., Clark, R. A., Liu, L., Wagers, A. J., Fuhlbrigge, R. C., and Kupper, T. S. (2012). Skin infection  
442 generates non-migratory memory CD8<sup>+</sup> T<sub>RM</sub> cells providing global skin immunity. *Nature* 483, 227–231.  
443 doi:10.1038/nature10851
- 444 Keren, K., Pincus, Z., Allen, G. M., Barnhart, E. L., Marriott, G., Mogilner, A., et al. (2008). Mechanism of shape  
445 determination in motile cells. *Nature* 453, 475–480. doi:10.1038/nature06952
- 446 Klein, L. (2009). Dead man walking: how thymocytes scan the medulla. *Nature Immunology* 10, 809–811.  
447 doi:10.1038/ni0809-809

- 448 Krummel, M. F., Bartumeus, F., and Grard, A. (2016). T cell migration, search strategies and mechanisms. *Nature*  
449 *Reviews Immunology* 16, 193–201. doi:10.1038/nri.2015.16
- 450 Maiuri, P., Rupprecht, J.-F., Wieser, S., Ruprecht, V., Bnichou, O., Carpi, N., et al. (2015). Actin Flows  
451 Mediate a Universal Coupling between Cell Speed and Cell Persistence: Cell 161, 374–386. doi:<https://doi.org/10.1016/j.cell.2015.01.056>  
452
- 453 Maiuri, P., Terriac, E., Paul-Gilloteaux, P., Vignaud, T., McNally, K., Onuffer, J., et al. (2012). The first World Cell  
454 Race. *Current Biology* 22, R673–R675. doi:10.1016/j.cub.2012.07.052
- 455 Miller, M. J., Wei, S. H., Cahalan, M. D., and Parker, I. (2003). Autonomous T cell trafficking examined in  
456 vivo with intravital two-photon microscopy. *Proceedings of the National Academy of Sciences* 100, 2604–2609.  
457 doi:10.1073/pnas.2628040100
- 458 Miller, M. J., Wei, S. H., Parker, I., and Cahalan, M. D. (2002). Two-Photon Imaging of Lymphocyte Motility and  
459 Antigen Response in Intact Lymph Node. *Science* 296, 1869–1873. doi:10.1126/science.1070051
- 460 Niculescu, I., Textor, J., and de Boer, R. J. (2015). Crawling and Gliding: A Computational Model for Shape-Driven  
461 Cell Migration. *PLOS Computational Biology* 11, 1–22. doi:10.1371/journal.pcbi.1004280
- 462 Ofer, N., Mogilner, A., and Keren, K. (2011). Actin disassembly clock determines shape and speed of lamellipodial  
463 fragments. *Proceedings of the National Academy of Sciences* 108, 20394–20399. doi:10.1073/pnas.1105333108
- 464 Tejedor, V., Voituriez, R., and Bnichou, O. (2012). Optimizing Persistent Random Searches. *Physical Review*  
465 *Letters* 108, 088103. doi:10.1103/PhysRevLett.108.088103
- 466 Tweedy, L., Meier, B., Stephan, J., Heinrich, D., and Endres, R. G. (2013). Distinct cell shapes determine accurate  
467 chemotaxis. *Scientific Reports* 3, 2606. doi:10.1038/srep02606
- 468 Witt, C. M., Raychaudhuri, S., Schaefer, B., Chakraborty, A. K., and Robey, E. A. (2005). Directed Migration of  
469 Positively Selected Thymocytes Visualized in Real Time. *PLOS Biology* 3, e160. doi:10.1371/journal.pbio.0030160
- 470 Wu, P.-H., Giri, A., Sun, S. X., and Wirtz, D. (2014). Three-dimensional cell migration does not follow a random  
471 walk. *Proceedings of the National Academy of Sciences* 111, 3949–3954. doi:10.1073/pnas.1318967111
- 472 Zaid, A., Mackay, L. K., Rahimpour, A., Braun, A., Veldhoen, M., Carbone, F. R., et al. (2014). Persistence of  
473 skin-resident memory T cells within an epidermal niche. *Proceedings of the National Academy of Sciences* 111,  
474 5307–5312. doi:10.1073/pnas.1322292111



475 **Supplementary Figures**

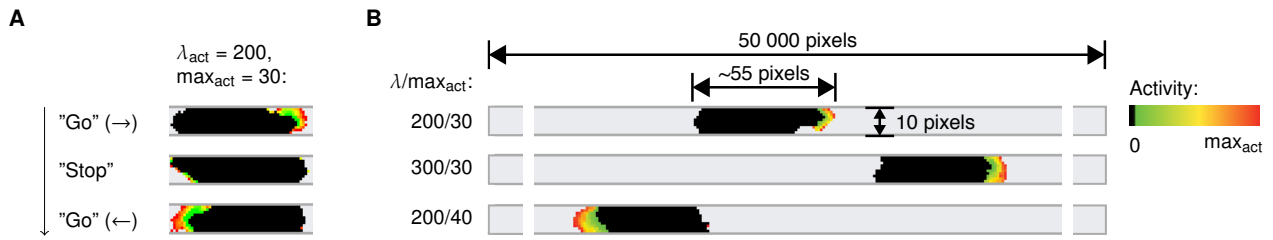

**Figure S1:** Act cells in microchannels have "stop-and-go" motility and variable protrusion sizes. **(A)** Example of "stop-and-go" motility. When a protrusion decays, the cell stops until a new protrusion forms – which may be in another direction. **(B)** Example cells for different combinations of the parameters  $\text{max}_{\text{act}}/\lambda_{\text{act}}$ .

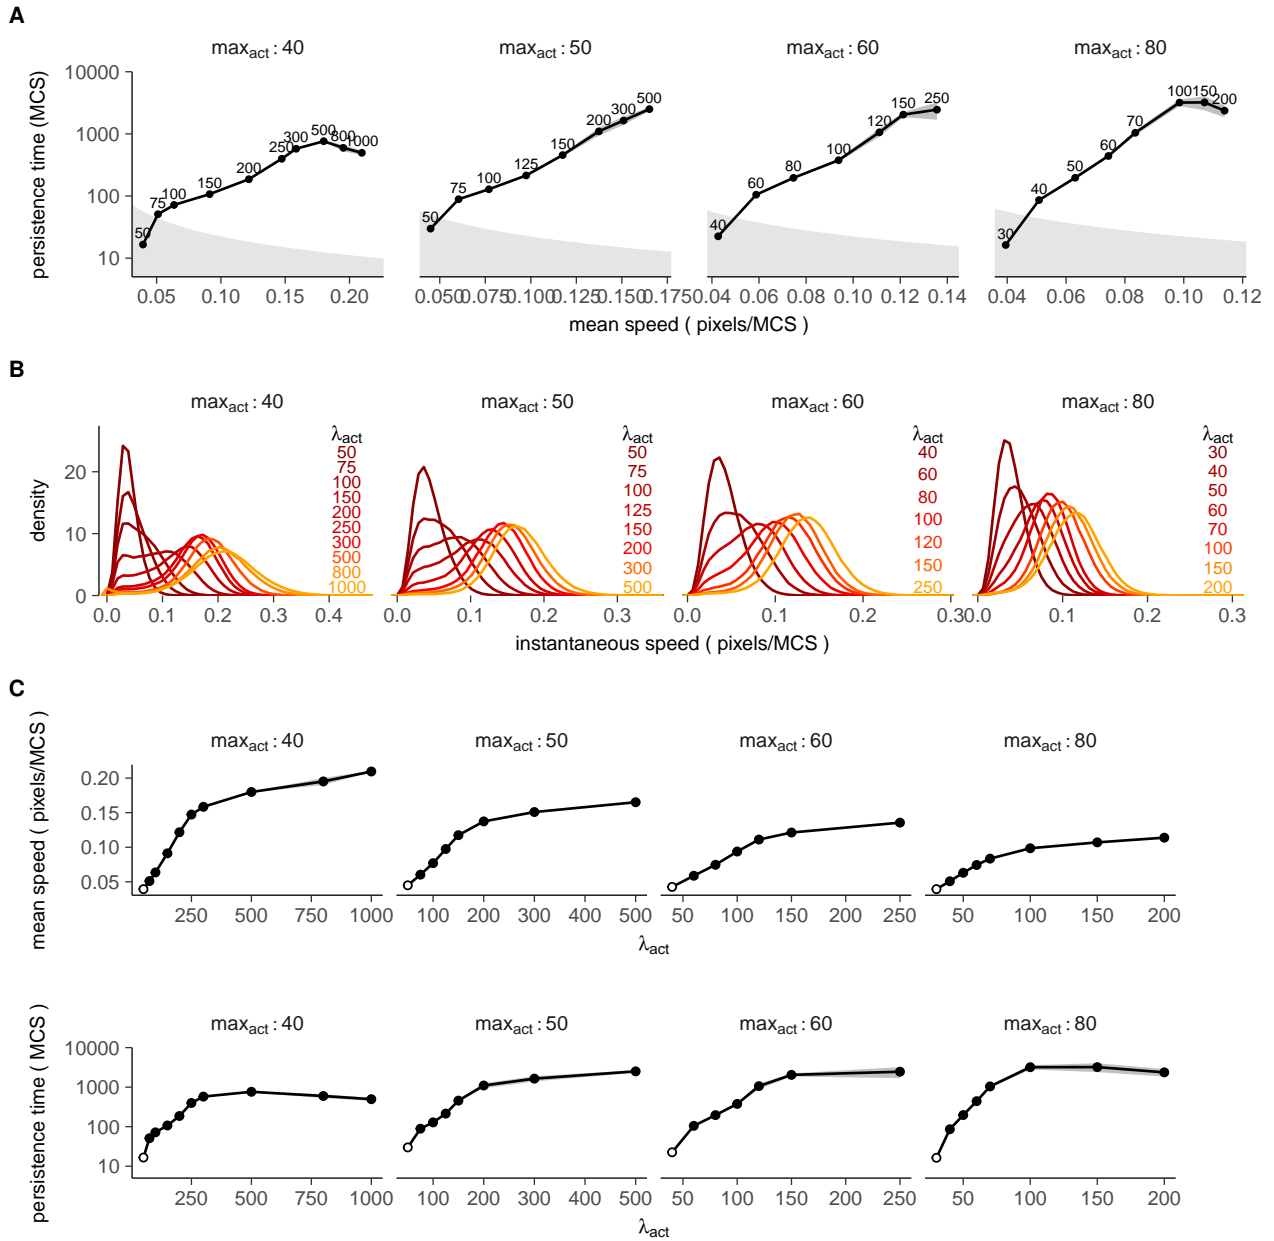

**Figure S2:** Act cells in 2D show similar behavior for different values of  $\max_{act}$ , see also Figure 3B,C and 4A. Plots show (A) Exponential speed-persistence coupling, (B) Distributions of instantaneous speeds, and (C) Saturation of speed and persistence at high  $\lambda_{act}$  values.

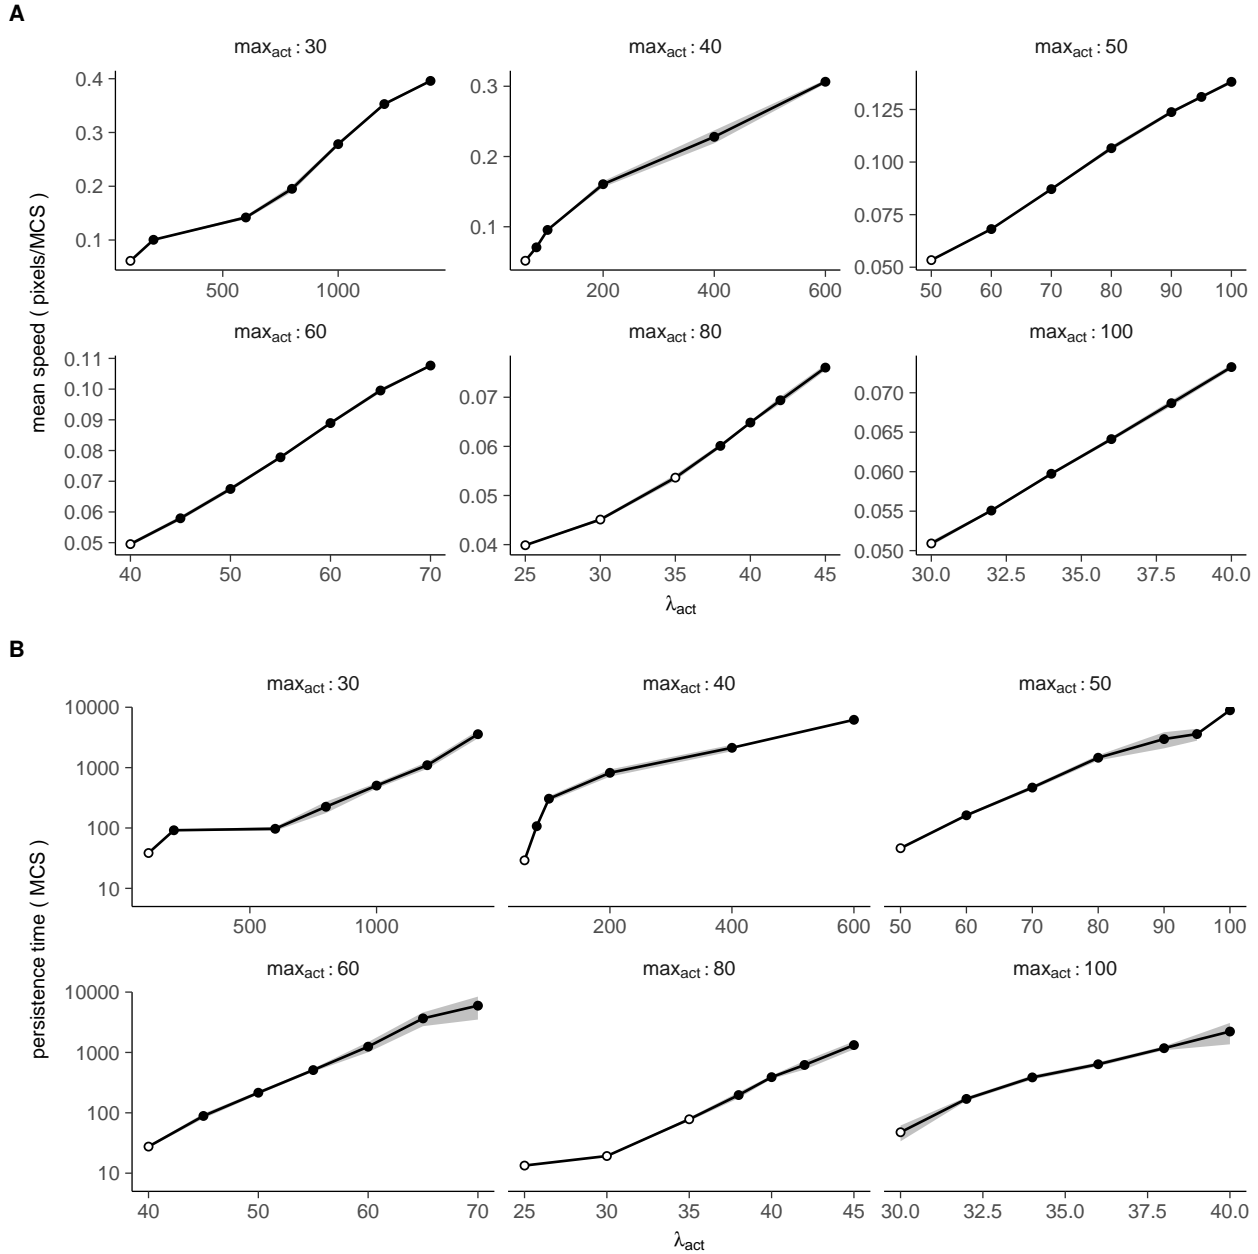

**Figure S3:** Confinement of Act cells in microchannels slows down saturation of speed and persistence. Plots show mean  $\pm$  SD of (A) cell speed, and (B) persistence as a function of  $\lambda_{act}$ , for different values of  $max_{act}$ . Open circles indicate points where the persistence time is lower than the time it takes the cell to move 10% of its length (corresponding to points in the gray region in Figure 2).

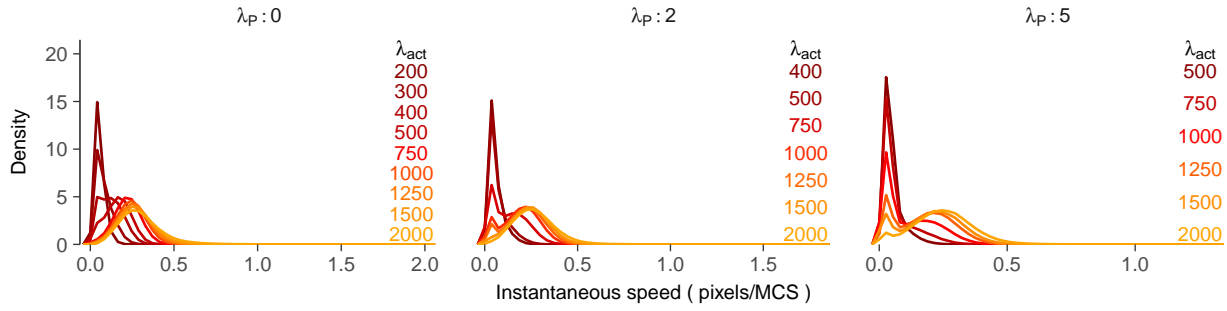

**Figure S4:** Act T cells in skin display "stop-and-go" behavior. Plots show distributions of instantaneous speed for different values of the tissue rigidity parameter  $\lambda_P$  and migration parameter  $\lambda_{act}$  (see also Figures 3C and S2B).

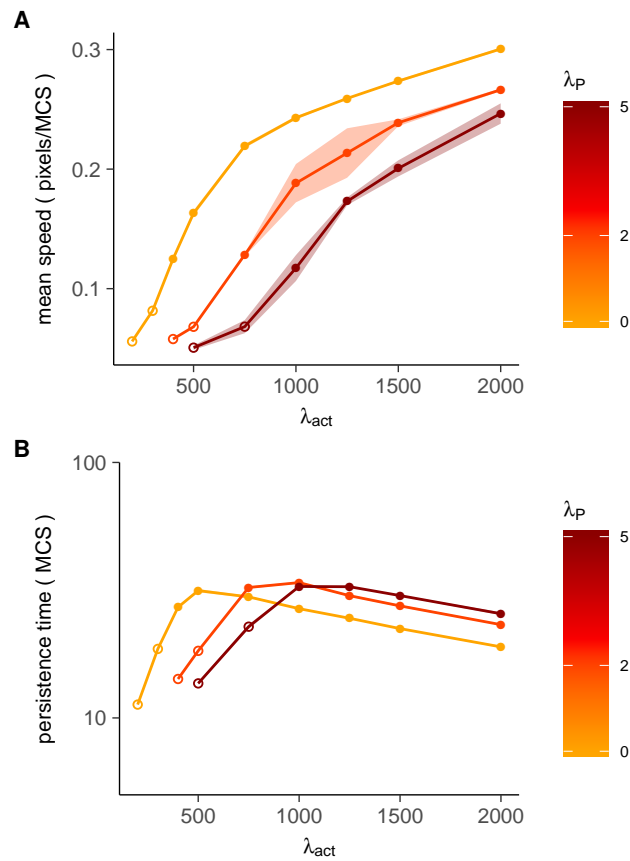

**Figure S5:** Both speed and persistence saturate for T cells moving in skin. Plots show mean  $\pm$  SD of (A) cell speed, and (B) persistence as a function of  $\lambda_{act}$ , for different values of the tissue rigidity parameter  $\lambda_P$ . Open circles indicate points where the persistence time is lower than the time it takes the cell to move 10% of its length (corresponding to points in the gray region in Figure 5).
